# Supplementary material for: Rhabdomyolysis and respiratory insufficiency due to the common ETFDH mutation of c.250G>A in two patients with late-onset multiple acyl-CoA dehydrogenase deficiency
Source: PubMed Central journal article supplement — Chin Med J (Engl). 2019 Jul 5;132(13):1615–8. doi: 10.1097/CM9.0000000000000288 (PMC6616237; doi:10.1097/cm9.0000000000000288), 2019-07-05
Supplement: cm9-132-1615-s001.pdf [file cm9-132-1615-s001.pdf]

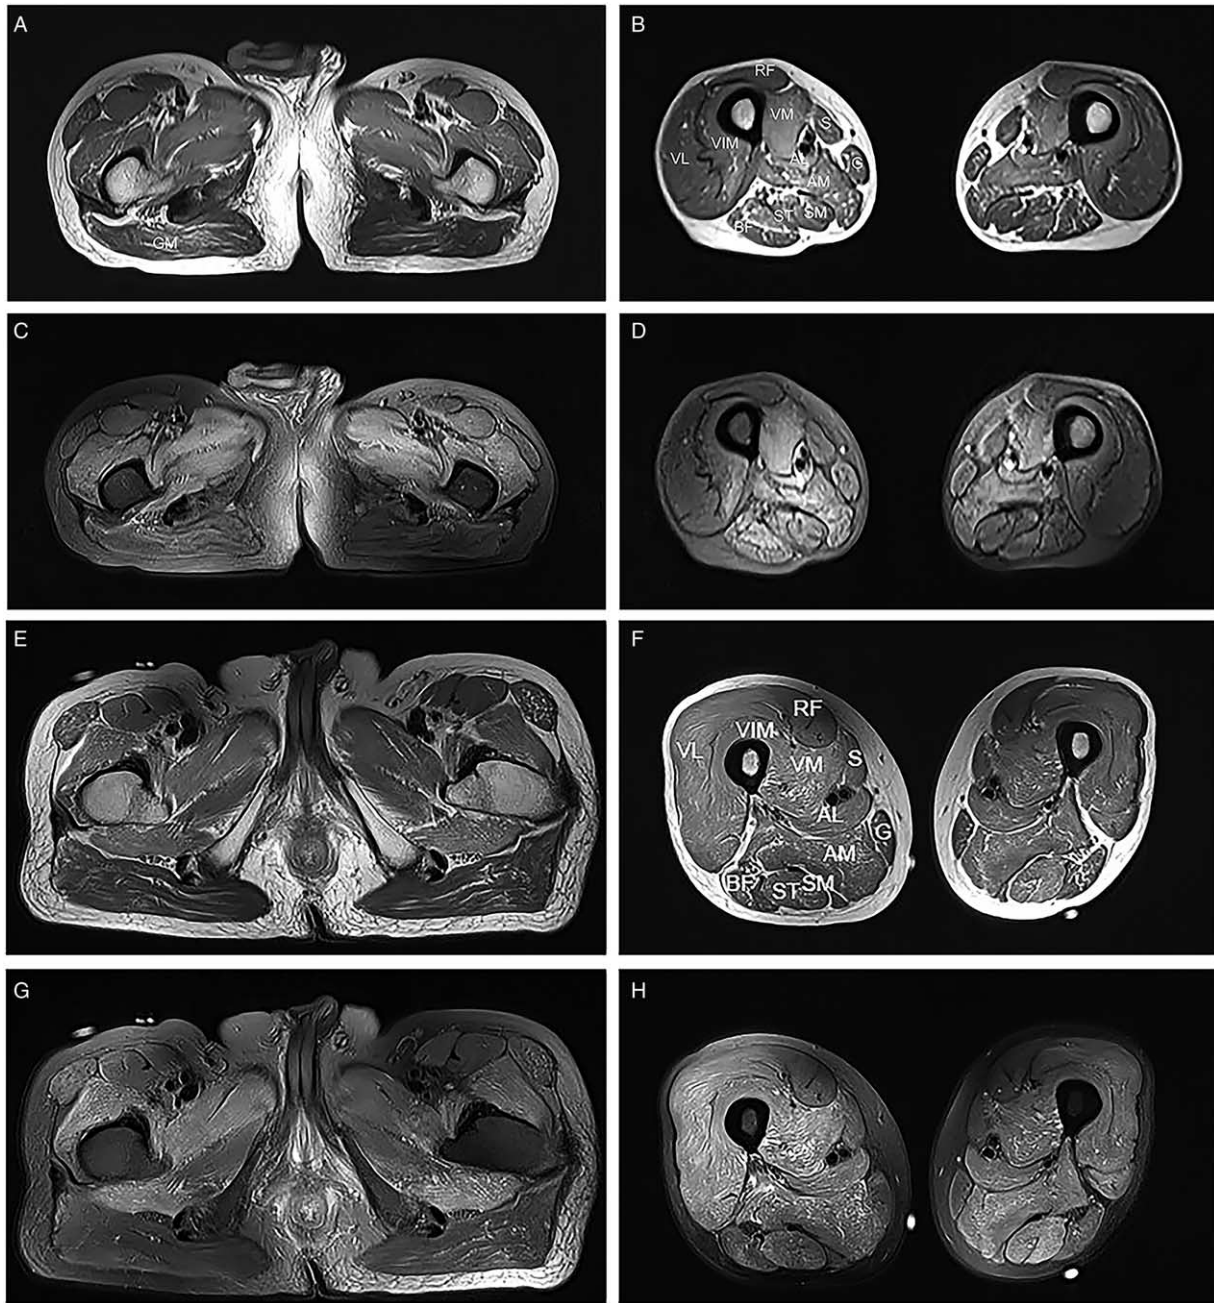

Supplementary Figure 1: 3.0T MRI scan of the pelvic and thigh muscles of both patients after suffering rhabdomyolysis. (A–D) MRI of Patient 1 showed an obvious filamentous high signal in GM and punctate high signal and muscle atrophy in S, G, and BF in the T1 phase (A, B). The STIR phase (C, D) showed wide-spread edema in affected muscles. (E–H) MRI of Patient 2 showed an obvious filamentous high signal in GM, G, and BF, as well as a punctate high signal in AM and ST and muscle atrophy in SM, ST, and BF in the T1 phase (E, F). The high signals were not suppressed and showed muscle swelling and edema in the STIR phase (G, H). AM: Adductor magnus; BF: Biceps femoris; G: Gracilis; GM: Gluteus maximus; MRI: Magnetic resonance imaging; S: Sartorius; SM: Semi-membranosus; ST: Semi-tendinosus.
